# Supplementary material for: The Rolf Method of Structural Integration on Fascial Tissue Stiffness, Elasticity, and Superficial Blood Perfusion in Healthy Individuals: The Prospective, Interventional Study
Source: PubMed Central journal article supplement (PMC7522439; doi:10.3389/fphys.2020.01062), 2020-09-15
Supplement: Data_Sheet_1.pdf [file Data_Sheet_1.pdf]

## *Supplementary Material*

**Table 1. Description of ten Structural Integration intervention (Jacobson 2011).**

| <b>Session</b> | <b>Intervention</b>                                                                                                                                                                             |
|----------------|-------------------------------------------------------------------------------------------------------------------------------------------------------------------------------------------------|
| <b>1</b>       | Increase length and pliability of FT on anterior aspect of trunk, allowing freer respiratory movement of ribs, of FT connecting shoulder girdle to rib cage and hips to pelvis.                 |
| <b>2</b>       | Increase consistency of FT pliability in feet, ankles and knees, increasing the support they provide for the upper body.                                                                        |
| <b>3</b>       | Increase anterior–posterior and cephalic–caudal pliability in FT of the lateral side of the body and in left/right and anterior/posterior balance, increase independence of thorax from pelvis. |
| <b>4</b>       | Increase pliability, left/right and anterior/posterior balance of FT of the medial aspect of legs and pelvic floor.                                                                             |
| <b>5</b>       | Increase pliability and left/right and surface to deep balance in FT comprising the anterior aspect of the pelvis and lumbar spine.                                                             |
| <b>6</b>       | Increase pliability and left/right and surface to deep balance in FT comprising posterior aspect from heel to back.                                                                             |
| <b>7</b>       | Increase pliability and left/right and anterior/posterior balance in FT of the cranium and cervical spine.                                                                                      |
| <b>8</b>       | Increase FT pliability and left/right balance in the hands, wrists, elbows, and arms; increase biomechanical flow between upper extremities and spine.                                          |
| <b>9</b>       | Increase FT pliability comprising the lower extremities through hips and pelvis; increase biomechanical flow between lower extremities and spine.                                               |
| <b>10</b>      | Optimize biomechanical flow through extremities, shoulder, and pelvic girdles to spine; increase overall uniformity of tonus.                                                                   |

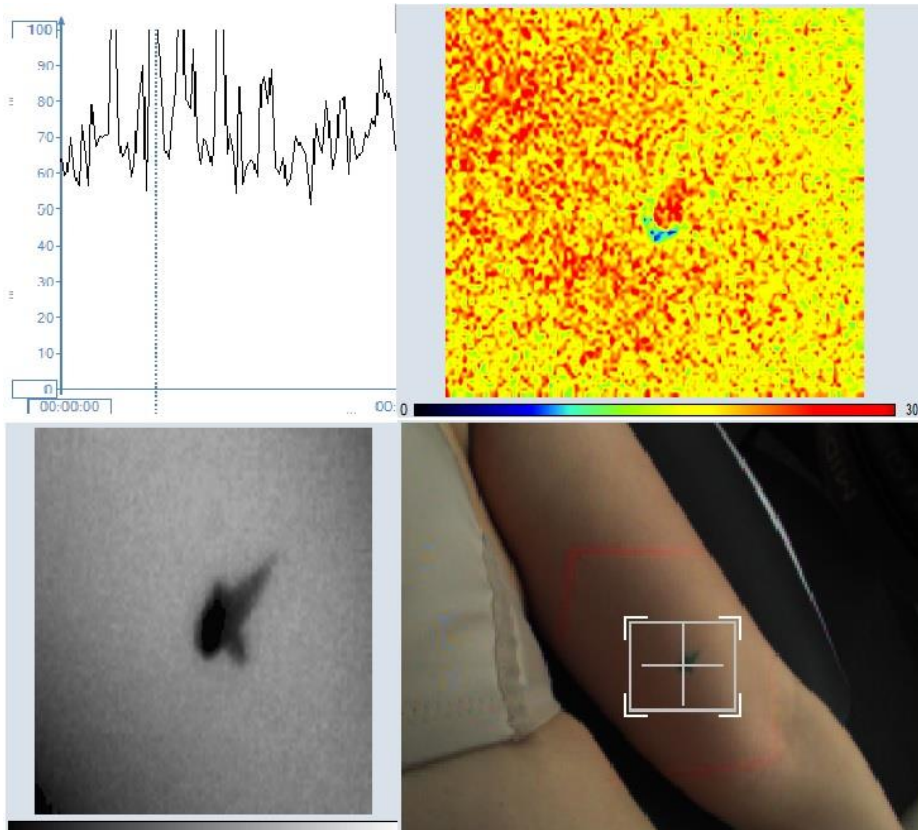

**Figure 1. Measurement over the Biceps Brachii, caput longum (BB) point location by Laser speckle contrast analysis 146 (LASCA) technique (blood perfusion).**

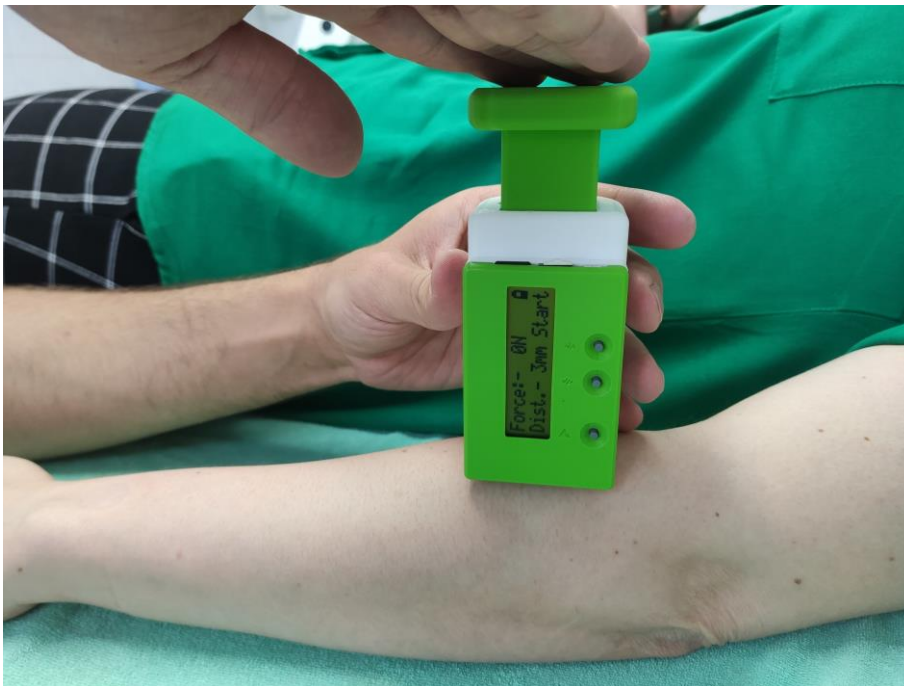

**Figure 2. Measurement over the Brachioradialis (BR) point location by IndentoPRO Tissue Compliance meter (stiffness and elasticity).**

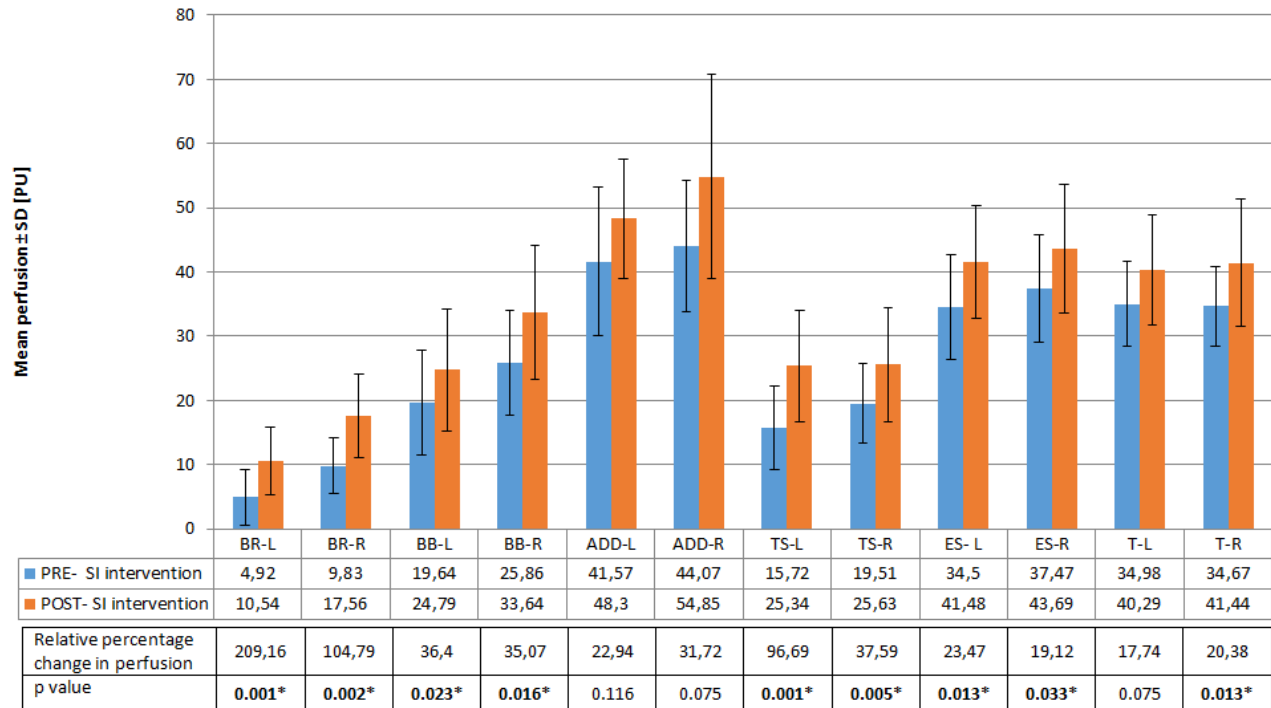

**Figure 3. Mean change in FT blood perfusion pre and post SI intervention.**

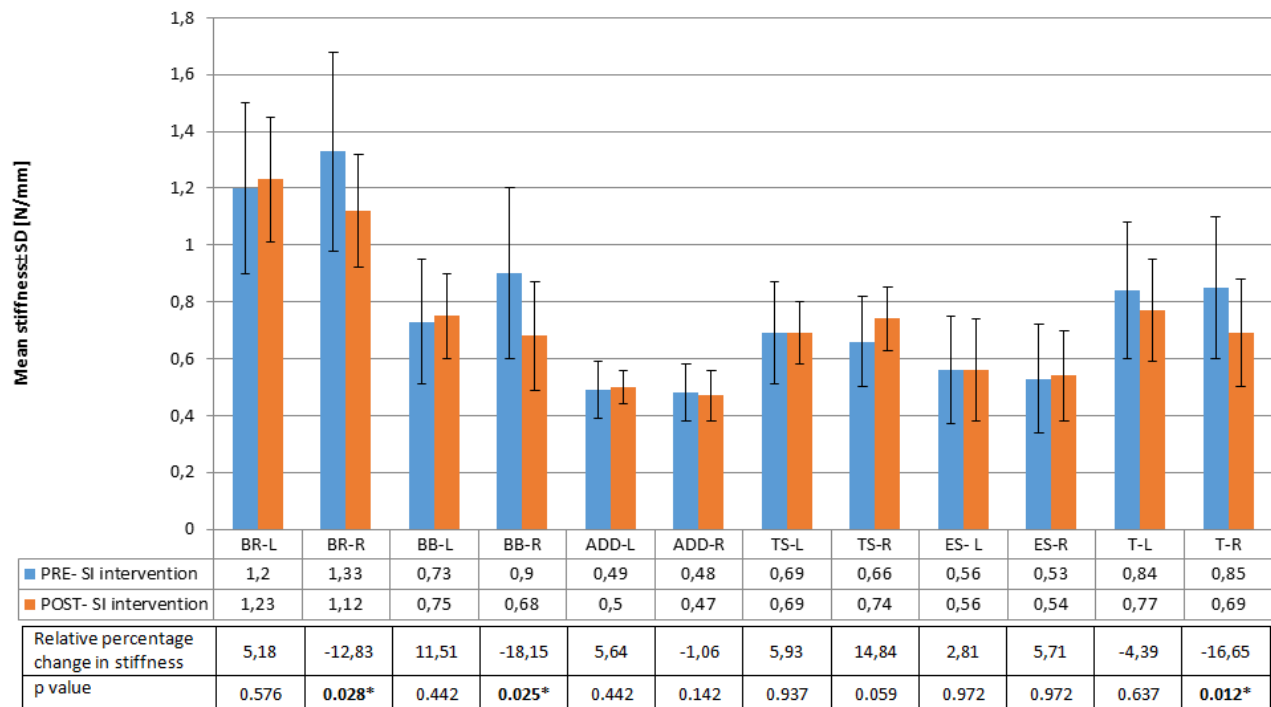

**Figure 4. Mean change in FT stiffness pre and post SI intervention.**

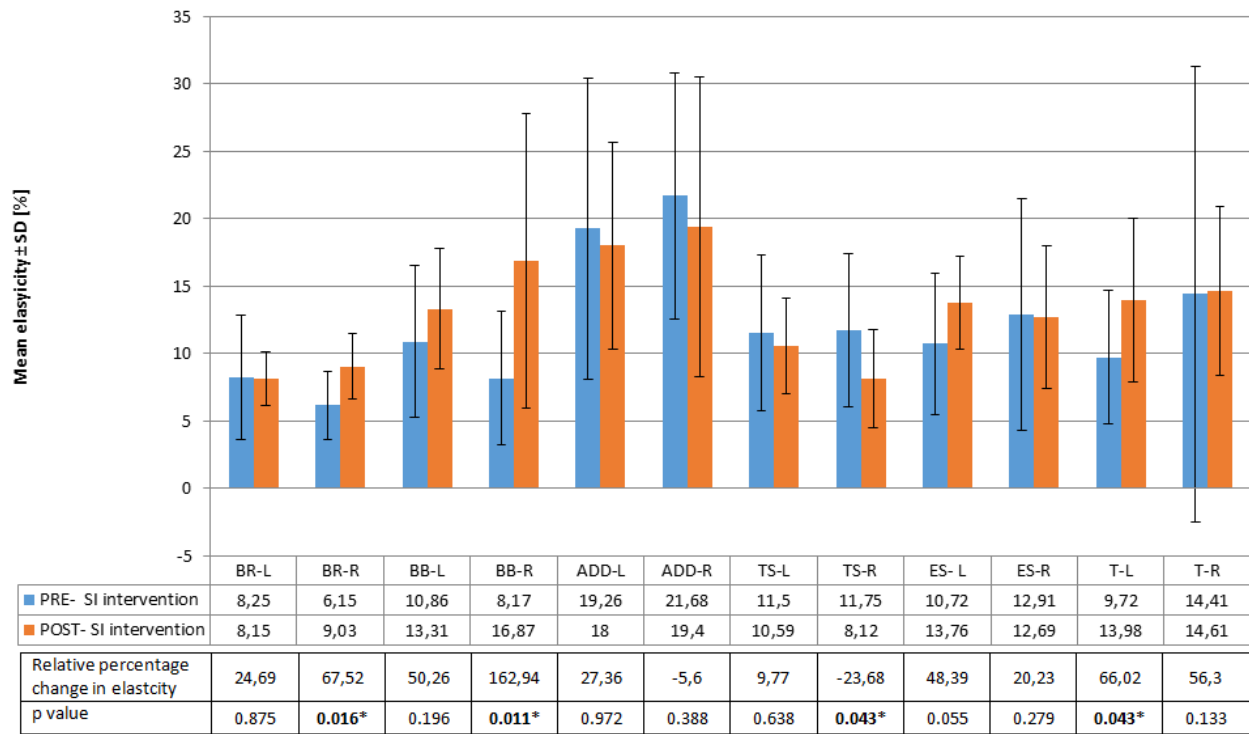

**Figure 5. Mean change in FT elasticity pre and post SI intervention.**
